# Supplementary material for: Salt intrusion dynamics in a well-mixed sub-estuary connected to a partially to well-mixed main estuary
Source: Copernicus journal article supplement (doi:10.5194/egusphere-2023-2248), 2023-10-23
Supplement: Supplementary file 1 [file egusphere-2023-2248-supplement.pdf]

## Supplement:

We present the longitudinal profiles of subtidal current and salinity along the channels in the main estuary and the sub-estuary during typical spring and neap tides. Fig. S1 is for the dry condition with  $1500 \text{ m}^3/\text{s}$  at the head of the main estuary, and Fig. S2 for the extremely dry condition with  $500 \text{ m}^3/\text{s}$  released at the head of the main estuary.

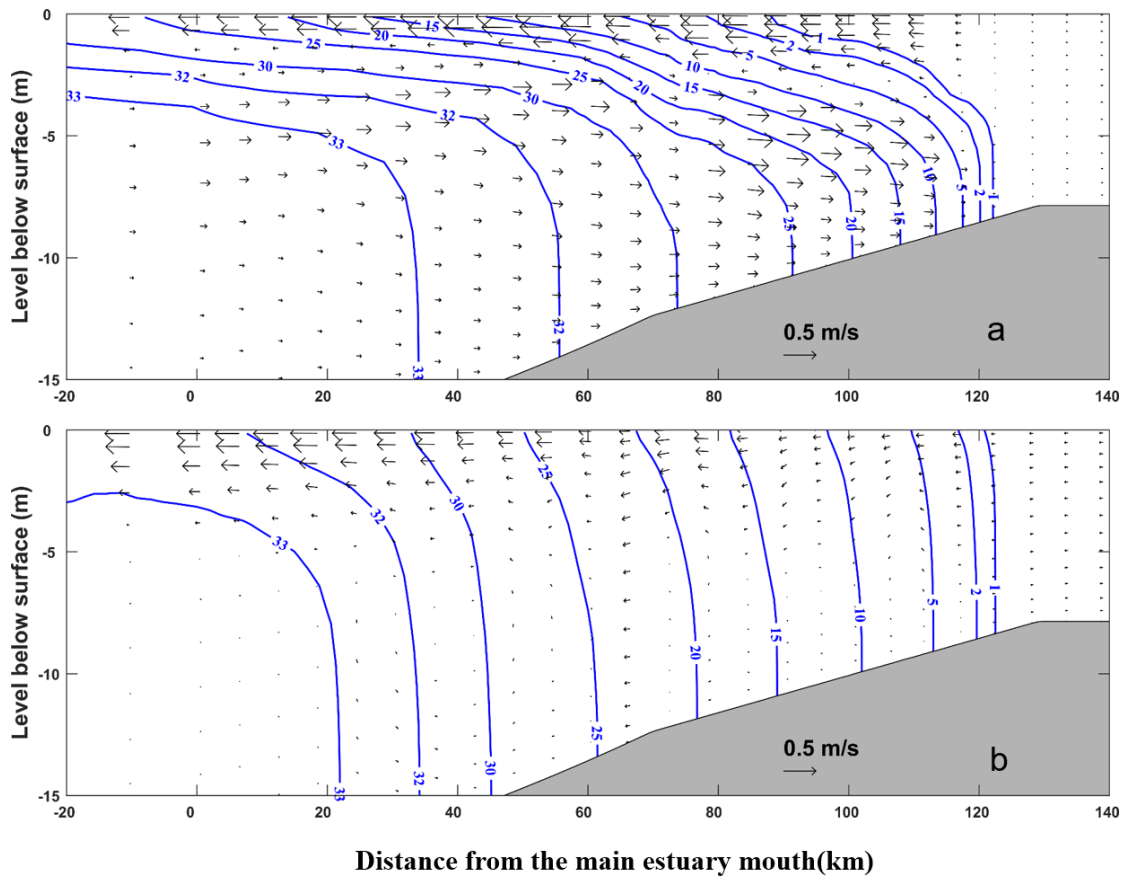

Fig. S1. The longitudinal profile of salinity and mean current in the main estuary under the river discharge of  $1500 \text{ m}^3/\text{s}$ : a) during a neap tide; b) during a spring tide.

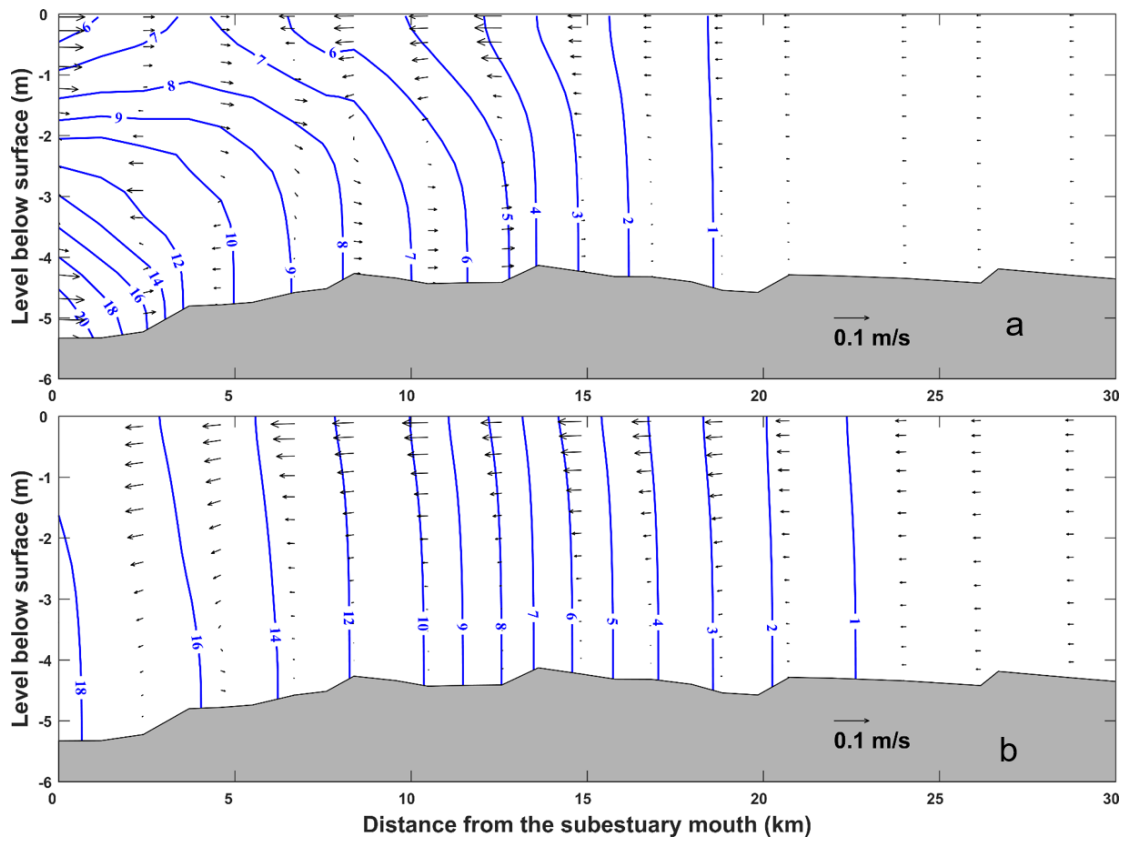

Fig. S2. The longitudinal profile of salinity and mean current in the main estuary under the river discharge of  $500 \text{ m}^3/\text{s}$ : a) during a neap tide; b) during a spring tide.
